# Supplementary material for: The Genetic Spectrum of Maturity-Onset Diabetes of the Young (MODY) in Qatar, a Population-Based Study
Source: MDPI journal article supplement (doi:10.3390/ijms24010130), 2022-12-21
Supplement: s1 [file s1]

**Supplementary Table S2.** The classification (diabetes subtypes) and clinical characteristics of participants with MODY mutations.

|                    | Type 1 Diabetes | Type 2 Diabetes | Non-diabetes |
|--------------------|-----------------|-----------------|--------------|
| Number of subjects | 1 (0.9%)        | 48 (47.5%)      | 52 (51.5%)   |
| Age                | 26              | 50.0±14.2       | 40.9±11.4    |
| Age <30            | 1 (0.9%)        | 6 (5.9%)        | 12 (11.9%)   |
| Age ≥ 30           |                 | 42 (41.6%)      | 40 (39.6%)   |
| Gender             |                 |                 |              |
| Male               | 1 (0.9%)        | 27* (26.7%)     | 18 (17.8%)   |
| Female             | -               | 21* (20.8%)     | 34 (30.7%)   |
| BMI**              |                 |                 |              |
| Underweight        | -               | -               | -            |
| Normal weight      | -               | 3* (2.9%)       | 14 (13.9%)   |
| Overweight         | -               | 15* (14.8%)     | 22 (21.8%)   |
| Obese              | 1 (0.9%)        | 30* (29.7%)     | 16 (15.8%)   |
| HbA1c (%)          | 9.1             | 6.75±1.77*      | 5.38±0.45    |
| C-peptide (ng/ml)  | <0.08           | 2.6±1.19*       | 2.22±0.83    |
| Genes†             |                 |                 |              |
| <i>HNF4A</i>       | -               | 5 (4.9%)        | 1 (0.9%)     |
| <i>GCK</i>         | 1 (0.9%)        | 5 (4.9%)        | 5 (4.9%)     |
| <i>HNF1A</i>       | -               | 11 (10.9%)      | 28 (27.7%)   |
| <i>PDX1</i>        | -               | 3 (2.9%)        | 3 (2.9%)     |
| <i>HNF1B</i>       | -               | 2 (1.9%)        | 1 (0.9%)     |
| <i>NEUROD1</i>     | -               | 1 (0.9%)        | -            |
| <i>KLF11</i>       | -               | 3 (2.9%)        | 1 (0.9%)     |
| <i>CEL</i>         | -               | 4 (3.9%)        | -            |
| <i>PAX4</i>        | -               | -               | -            |
| <i>INS</i>         | -               | -               | -            |
| <i>BLK</i>         | -               | 1 (0.9%)        | 10 (9.9%)    |
| <i>ABCC8</i>       | -               | 3 (2.9%)        | 3 (2.9%)     |
| <i>KCNJ11</i>      | -               | 2 (1.9%)        | -            |
| <i>APPL1</i>       | -               | 1 (0.9%)        | -            |
| <i>RFX6</i>        | -               | 3 (2.9%)        | -            |
| <i>NKX6-1</i>      | -               | 4 (3.9%)        | -            |

MODY participants comprised 101 subjects. Percentages shown in brackets are calculated from total number of MODY subjects (n=101). \*Statistically significant ( $P < 0.001$ ) compared to non-diabetes controls. BMI: body mass index. \*\*Subjects with BMI below 18.5 kg/m<sup>2</sup> were classified as underweight, between 18.5 to 24.9 kg/m<sup>2</sup> as normal weight, between 25 to 29.9 kg/m<sup>2</sup> as overweight, and greater than or equal to 30 kg/m<sup>2</sup> as obese. †No. of subjects carrying MODY-gene mutation.
