# Supplementary material for: The Genetic Spectrum of Maturity-Onset Diabetes of the Young (MODY) in Qatar, a Population-Based Study
Source: MDPI journal article supplement (doi:10.3390/ijms24010130), 2022-12-21
Supplement: s1 [file s1]

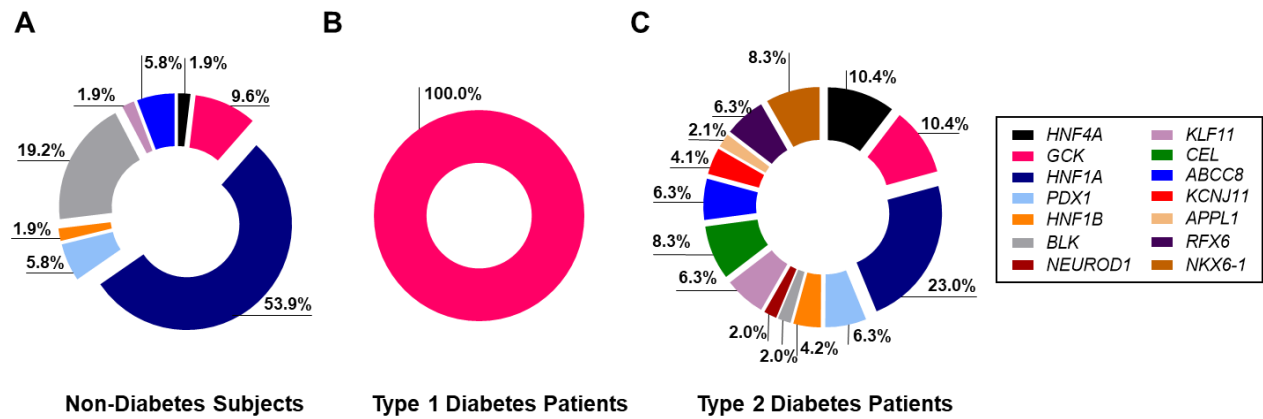

**Supplementary Figure S1.** Distribution of MODY- related mutations across the diabetes status categories. Donut charts represent the proportions of subjects carrying MODY-related gene mutations in **A.** Non-diabetes subjects, **B.** Type 1 Diabetes and **C.** Type 2 Diabetes subjects, classified based on clinical characteristics.
