# Supplementary material for: The Genetic Spectrum of Maturity-Onset Diabetes of the Young (MODY) in Qatar, a Population-Based Study
Source: MDPI journal article supplement (doi:10.3390/ijms24010130), 2022-12-21
Supplement: s1 [file s1]

**Supplementary Table S1.** Clinical Characteristics of MODY subjects Detected with Previously Reported MODY Mutations and Potentially Novel MODY-causing Mutations.

|                            | <b>MODY cases*</b> |
|----------------------------|--------------------|
| Number of subjects         | 101                |
| Age (mean±SD)              | 43.8±13.23         |
| Male                       | 46 (45.5%)         |
| Female                     | 55 (54.5%)         |
| BMI (Kg/m <sup>2</sup> )** |                    |
| Underweight                | -                  |
| Normal                     | 17 (16.8%)         |
| Overweight                 | 37 (36.6%)         |
| Obese                      | 47 (46.5%)         |
| Diabetic                   |                    |
| Yes                        | 49 (48.5%)         |
| No                         | 52 (51.5%)         |
| HbA1c (%)                  | 6.33±1.60          |
| C-peptide (ng/ml)          | 2.43±1.039         |
| Family History of Diabetes |                    |
| Father                     | 38 (37.6%)         |
| Mother                     | 58 (57.4%)         |
| Both                       | 27 (26.7%)         |
| Treatment                  |                    |
| Insulin                    | 13 (12.9%)         |
| Tablets                    | 27 (26.7%)         |

\*MODY participants comprised of 101 subjects. BMI: body mass index. \*\*Subjects with BMI below 18.5 kg/m<sup>2</sup> were classified as underweight, between 18.5 to 24.9 kg/m<sup>2</sup> as normal weight, between 25 to 29.9 kg/m<sup>2</sup> as overweight, and greater than or equal to 30 kg/m<sup>2</sup> as obese. N/A, not available.
